# Supplementary material
Source: PubMed Central journal article supplement (PMC3810947)
Supplement: NIHMS474675-supplement-1.pdf [file NIHMS474675-supplement-1.pdf]

## Supplementary Information for

### **Genome-wide association analysis identifies new susceptibility loci for Behçet's disease and epistasis between *HLA-B\*51* and *ERAP1***

Yohei Kirino, George Bertias, Yoshiaki Ishigatsubo, Nobuhisa Mizuki, Ilknur Tugal-Tutkun, Emire Seyahi, Yilmaz Ozyazgan, F. Sevgi Sacli, Burak Erer, Hidetoshi Inoko, Zeliha Emrence, Atilla Cakar, Neslihan Abaci, Duran Ustek, Colleen Satorius, Atsuhisa Ueda, Mitsuhiro Takeno, Yoonhee Kim, Geryl M. Wood, Michael J. Ombrello, Akira Meguro, Ahmet Gül, Elaine F. Remmers & Daniel L. Kastner

## Supplementary Figure 1.

### Conditional regression analysis of the *KLRK1-KLRC1* and the *CCR1-CCR3* loci.

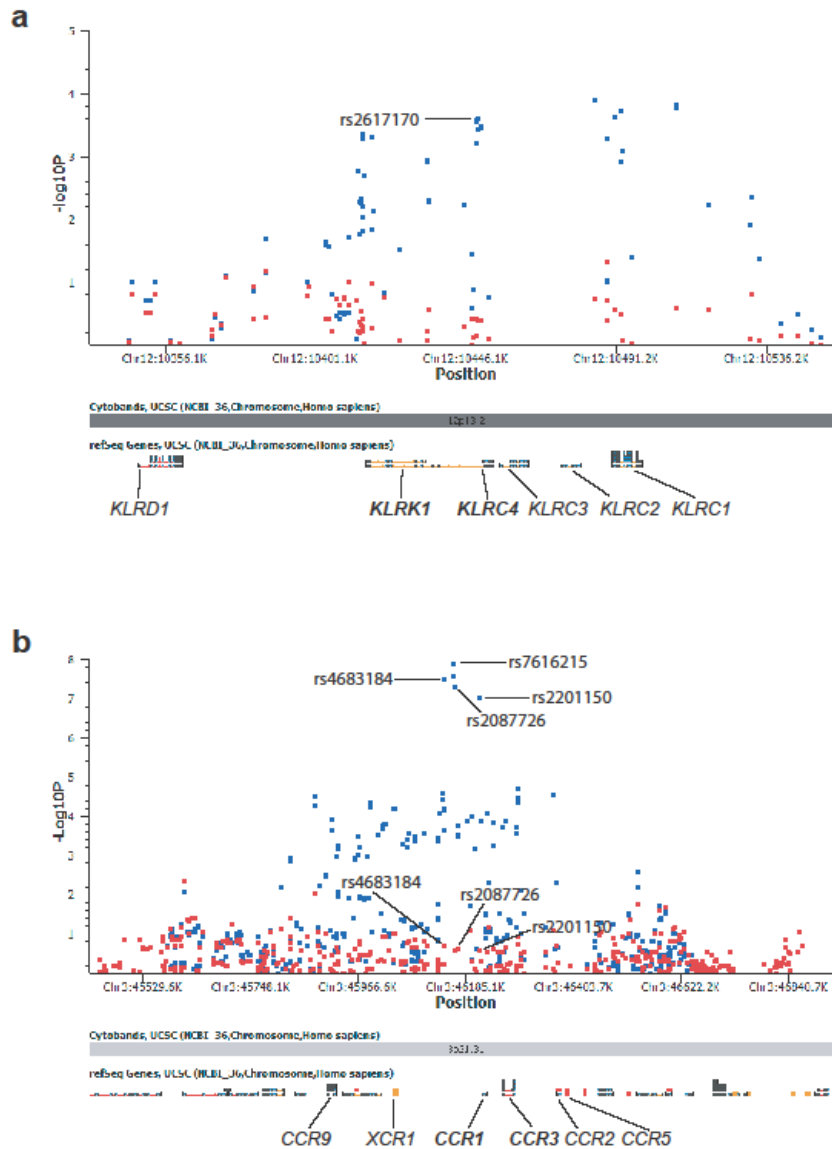

Conditional regression analysis with covariates (a) rs2617170 in the *KLRK1-KLRC1* locus, and (b) rs7616215 in the *CCR1-CCR3* locus.  $-\log_{10}P$  values are shown. Blue and red dots represent values before and after the conditioning, respectively.

**Supplementary Table 1. SNP associations with  $p < 3 \times 10^{-5}$  determined from the imputed genotype data in Turkish GWAS samples.**

| Marker     | Chromosome | Position  | Chi-Squared P | Original GWAS<br>Chi-Squared P | Gene                        | Odds Ratio |
|------------|------------|-----------|---------------|--------------------------------|-----------------------------|------------|
| rs6660226  | 1          | 67517189  | 1.08E-05      |                                | <i>IL23R-IL12RB2</i>        | 0.771      |
| rs924080   | 1          | 67532728  | 5.36E-06      | 5.35E-06                       | <i>IL23R-IL12RB2</i>        | 0.764      |
| rs3024490  | 1          | 205011934 | 3.02E-07      | 2.22E-07                       | <i>IL10</i>                 | 1.357      |
| rs1800871  | 1          | 205013257 | 3.02E-07      |                                | <i>IL10</i>                 | 1.357      |
| rs7572482  | 2          | 191723317 | 2.92E-05      | 3.18E-05                       | <i>STAT4</i>                | 1.269      |
| rs10177805 | 2          | 235090172 | 2.49E-05      |                                | <i>ARL4C</i>                | 0.642      |
| rs4678929  | 3          | 33388267  | 1.73E-05      |                                | <i>FBXL2</i>                | 0.719      |
| rs2291897  | 3          | 33394426  | 1.47E-05      | 1.82E-05                       | <i>FBXL2</i>                | 0.717      |
| rs4045539  | 3          | 33396182  | 1.56E-05      |                                | <i>UBP1</i>                 | 0.718      |
| rs1807844  | 3          | 33447941  | 2.13E-05      | 5.56E-05                       | <i>UBP1</i>                 | 0.722      |
| rs1357540  | 3          | 33454986  | 2.13E-05      | 2.69E-05                       | <i>UBP1</i>                 | 0.722      |
| rs6781484  | 3          | 33520789  | 4.66E-06      |                                | <i>CLASP2</i>               | 0.728      |
| rs12487660 | 3          | 33567576  | 2.90E-05      | 2.70E-05                       | <i>CLASP2</i>               | 0.755      |
| rs10510749 | 3          | 46155420  | 2.63E-05      | 4.22E-05                       | <i>CCR1-CCR3</i>            | 0.694      |
| rs7616215  | 3          | 46180690  | 1.29E-08      |                                | <i>CCR1-CCR3</i>            | 0.702      |
| rs9990343  | 3          | 46314816  | 1.87E-05      | 2.76E-05                       | <i>CCR1-CCR3</i>            | 0.770      |
| rs11706279 | 3          | 71600333  | 9.30E-06      |                                | <i>FOXP1</i>                | 1.291      |
| rs9819066  | 3          | 71605800  | 7.07E-06      | 4.55E-06                       | <i>FOXP1</i>                | 1.300      |
| rs6549391  | 3          | 71612605  | 1.32E-05      |                                | <i>FOXP1</i>                | 1.302      |
| rs9828629  | 3          | 71613036  | 1.42E-05      | 8.89E-06                       | <i>FOXP1</i>                | 1.289      |
| rs6789751  | 3          | 71629434  | 1.15E-05      |                                | <i>FOXP1</i>                | 1.304      |
| rs11720121 | 3          | 71677948  | 2.76E-05      | 1.28E-05                       | <i>FOXP1</i>                | 1.285      |
| rs6549400  | 3          | 71689156  | 1.85E-05      | 8.46E-06                       | <i>FOXP1</i>                | 1.292      |
| rs10049211 | 3          | 72597366  | 5.11E-06      | 5.35E-06                       | <i>RYBP</i>                 | 0.768      |
| rs17809756 | 3          | 161112778 | 1.20E-05      |                                | <i>IL12A</i>                | 1.637      |
| rs17810546 | 3          | 161147744 | 1.20E-05      | 1.49E-05                       | <i>IL12A</i>                | 1.637      |
| rs7634425  | 3          | 184503286 | 2.63E-05      | 2.97E-05                       | <i>MCF2L2</i>               | 0.760      |
| rs1010769  | 3          | 184507213 | 2.26E-05      |                                | <i>MCF2L2</i>               | 0.759      |
| rs936551   | 4          | 811490    | 1.11E-07      | 5.29E-08                       | <i>CPLX1</i>                | 0.739      |
| rs2018601  | 4          | 136913913 | 2.36E-05      |                                | <i>none</i>                 | 0.786      |
| rs1869947  | 4          | 154862953 | 2.41E-06      |                                | <i>RNF175</i>               | 1.623      |
| rs1495714  | 4          | 177074783 | 1.78E-05      | 1.93E-05                       | <i>GPM6A</i>                | 1.287      |
| rs4690647  | 4          | 177109914 | 1.10E-05      | 1.13E-05                       | <i>GPM6A</i>                | 1.288      |
| rs7731137  | 5          | 153985847 | 1.73E-05      | 9.50E-05                       | <i>LARP1</i>                | 1.291      |
| rs10486156 | 7          | 7315158   | 2.15E-06      | 3.69E-06                       | <i>COL28A1-<br/>C1GALT1</i> | 0.709      |
| rs13247109 | 7          | 111565661 | 1.75E-05      |                                | <i>DOCK4</i>                | 0.638      |

|            |    |           |          |          |                    |       |
|------------|----|-----------|----------|----------|--------------------|-------|
| rs13232973 | 7  | 111565822 | 2.26E-05 |          | <i>DOCK4</i>       | 0.642 |
| rs7004739  | 8  | 126397565 | 2.49E-05 | 2.14E-05 | <i>NSMCE2</i>      | 1.271 |
| rs17303101 | 9  | 118221615 | 1.04E-05 |          | <i>ASTN2</i>       | 1.320 |
| rs17220352 | 9  | 118287880 | 6.61E-06 |          | <i>ASTN2</i>       | 1.389 |
| rs488709   | 9  | 137699712 | 2.80E-05 |          | <i>LCN9</i>        | 0.648 |
| rs10898549 | 11 | 86281138  | 1.65E-05 |          | <i>FZD4-PRSS23</i> | 0.709 |
| rs2617150* | 12 | 10423701  | 1.20E-05 |          | <i>KLRK1</i>       | 0.630 |
| rs7295696  | 12 | 116915710 | 2.21E-05 | 1.77E-05 | <i>KSR2-RFC5</i>   | 0.782 |
| rs3764147  | 13 | 43355925  | 8.55E-06 | 7.36E-06 | <i>LACC1</i>       | 0.748 |
| rs1373904  | 13 | 43373398  | 7.78E-06 |          | <i>LACC1</i>       | 0.749 |
| rs1041167  | 13 | 45518136  | 2.55E-05 |          | <i>ZC3H13</i>      | 0.750 |
| rs8040564  | 15 | 51915197  | 2.92E-05 |          | <i>WDR72</i>       | 1.271 |
| rs7165549  | 15 | 51916365  | 1.14E-05 |          | <i>WDR72</i>       | 1.287 |
| rs9952236  | 18 | 48489851  | 2.39E-05 |          | <i>DCC</i>         | 1.336 |

\*SNP association data from the Japanese BD GWAS.

**Supplementary Table 2. Association of 22 selected variants in Turkish replication samples (838 cases and 630 controls).**

| Marker            | Chromosome | Position         | Chi-Squared P  | Loci*            | Odds Ratio   |
|-------------------|------------|------------------|----------------|------------------|--------------|
| <b>rs7574070†</b> | <b>2</b>   | <b>191718733</b> | <b>1.2E-05</b> | <b>STAT4</b>     | <b>1.337</b> |
| rs2291897         | 3          | 33394426         | 0.287          | FBXL2-CLASP2     | 0.904        |
| rs6781484         | 3          | 33520789         | 0.321          | FBXL2-CLASP2     | 0.940        |
| <b>rs7616215</b>  | <b>3</b>   | <b>46180690</b>  | <b>1.1E-05</b> | <b>CCR1-CCR3</b> | <b>0.70</b>  |
| rs9819066         | 3          | 71605800         | 0.621          | FOXP1            | 1.040        |
| rs10049211        | 3          | 72597366         | 0.414          | RYBP             | 1.064        |
| rs17809756        | 3          | 161112778        | 0.019          | IL12A            | 1.424        |
| <b>rs17810546</b> | <b>3</b>   | <b>161147744</b> | <b>0.020</b>   | <b>IL12A</b>     | <b>1.414</b> |
| rs1010769         | 3          | 184507213        | 0.636          | MCF2L2           | 1.044        |
| rs936551          | 4          | 811490           | 0.316          | CPLX1            | 0.927        |
| rs1869947         | 4          | 154862953        | 0.039          | RNF175           | 1.304        |
| rs4690647         | 4          | 177109914        | 0.351          | GPM6A            | 1.074        |
| rs7731137         | 5          | 153985847        | 0.646          | LARP1            | 1.036        |
| rs10486156        | 7          | 7315158          | 0.274          | COL28A1-C1GALT1  | 0.902        |
| rs13247109        | 7          | 111565661        | 0.866          | DOCK4            | 0.980        |
| rs17220352        | 9          | 118287880        | 0.819          | ASTN2            | 1.022        |
| rs10898549        | 11         | 86281138         | 0.520          | FZD4-PRSS23      | 1.068        |
| <b>rs2617170‡</b> | <b>12</b>  | <b>10452224</b>  | <b>7.6E-04</b> | <b>KLRC4</b>     | <b>0.767</b> |
| rs7295696         | 12         | 116915710        | 0.847          | KSR2-RFC5        | 0.986        |
| rs1373904         | 13         | 43373398         | 0.240          | LACC1            | 0.904        |
| rs7165549         | 15         | 51916365         | 0.673          | WDR72            | 1.033        |
| rs9952236         | 18         | 48489851         | 0.312          | DCC              | 1.095        |

\*Loci highlighted in **bold** were selected for validation and fine-map analysis.

†Surrogate marker for imputed *STAT4* SNP rs7572482.

‡Surrogate marker for Japanese BD GWAS *KLRK1* SNP rs2617150.

### Supplementary Table 3. Cochran-Mantel-Haenszel meta-analysis of BD

associated loci with Japanese cases restricted to those fulfilling the

International Study Group diagnostic criteria for Behçet's disease.

|                                                        | Series*                 | Method       | Diagnosis             | Subject <i>n</i>     | C    | T    | MAF(%) | OR (95% CI)             | <i>P</i> value               |
|--------------------------------------------------------|-------------------------|--------------|-----------------------|----------------------|------|------|--------|-------------------------|------------------------------|
| <b>CCR1-CCR3<br/>rs7616215</b>                         | Turkish<br>Discovery    | TOF-MS       | BD                    | 1180                 | 630  | 1730 | 27     | 0.71 (0.63-0.80)        | 2.17x10 <sup>-8</sup>        |
|                                                        | Control                 |              | 1258                  | 855                  | 1661 | 34   |        |                         |                              |
|                                                        | Japanese<br>replication | Affy<br>500K | BD                    | 494                  | 126  | 862  | 12.8   | 0.79 (0.66-1.01)        | 0.057                        |
|                                                        | Control                 |              | 692                   | 215                  | 1169 | 15.5 |        |                         |                              |
|                                                        | Turkish<br>replication  | TOF-MS       | BD                    | 816                  | 441  | 1191 | 27     | 0.70 (0.60-0.82)        | 1.09x10 <sup>-5</sup>        |
|                                                        | Control                 |              | 630                   | 436                  | 824  | 34.6 |        |                         |                              |
|                                                        | <b>Combined</b>         |              | <b>BD<br/>Control</b> | <b>2490<br/>2580</b> |      |      |        | <b>0.72 (0.66-0.78)</b> | <b>2.38x10<sup>-13</sup></b> |
|                                                        | Series                  | Method       | Diagnosis             | Subject <i>n</i>     | A    | C    | MAF(%) | OR (95% CI)             | <i>P</i> value               |
| <b>STAT4<br/>rs7574070</b>                             | Turkish<br>Discovery    | TOF-MS       | BD                    | 1166                 | 1128 | 1204 | 48.4   | 1.28 (1.14-1.43)        | 1.92x10 <sup>-5</sup>        |
|                                                        | Control                 |              | 1250                  | 1059                 | 1441 | 42.4 |        |                         |                              |
|                                                        | Japanese<br>replication | Affy<br>500K | BD                    | 433                  | 454  | 412  | 52.4   | 1.23 (1.01-1.37)        | 0.015                        |
|                                                        | Control                 |              | 716                   | 676                  | 756  | 47.2 |        |                         |                              |
|                                                        | Turkish<br>replication  | TOF-MS       | BD                    | 815                  | 803  | 827  | 49.3   | 1.34 (1.15-1.55)        | 1.12x10 <sup>-4</sup>        |
|                                                        | Control                 |              | 630                   | 530                  | 730  | 42.1 |        |                         |                              |
|                                                        | <b>Combined</b>         |              | <b>BD<br/>Control</b> | <b>2414<br/>2596</b> |      |      |        | <b>1.28 (1.18-1.39)</b> | <b>4.07x10<sup>-10</sup></b> |
|                                                        | Series                  | Method       | Diagnosis             | Subject <i>n</i>     | T    | C    | MAF(%) | OR (95% CI)             | <i>P</i> value               |
| <b>KLRC4<br/>rs2617170<br/>(KLRC4<br/>p.Asn104Ser)</b> | Turkish<br>Discovery    | TOF-MS       | BD                    | 1144                 | 734  | 1554 | 32.1   | 0.80 (0.71-0.90)        | 2.54x10 <sup>-4</sup>        |
|                                                        | Control                 |              | 1257                  | 933                  | 1581 | 37.1 |        |                         |                              |
|                                                        | Japanese<br>replication | Affy<br>500K | BD                    | 470                  | 302  | 638  | 32.1   | 0.79 (0.66-0.94)        | 8.26x10 <sup>-3</sup>        |
|                                                        | Control                 |              | 657                   | 493                  | 821  | 37.5 |        |                         |                              |
|                                                        | Turkish<br>replication  | TaqMan       | BD                    | 821                  | 510  | 1132 | 31.1   | 0.77 (0.66-0.89)        | 7.61x10 <sup>-4</sup>        |
|                                                        | Control                 |              | 628                   | 465                  | 791  | 37   |        |                         |                              |
|                                                        | <b>Combined</b>         |              | <b>BD<br/>Control</b> | <b>2435<br/>2542</b> |      |      |        | <b>0.79 (0.72-0.85)</b> | <b>1.03x10<sup>-8</sup></b>  |

\*TOF-MS, time-of-flight mass-spectrometry; MAF, minor allele frequency, OR, odds ratio; 95%CI, 95% confidence interval.

Meta-analysis results are denoted in **bold**.

**Supplementary Table 4. Cochran-Mantel-Haenszel meta-analysis of *ERAP1* non-synonymous coding variant rs17482078 in BD (cases with and without uveitis combined).**

|                                                                       | Series*                | Method | Diagnosis      | Subject <i>n</i> | TT | CC+CT | TT(%) | OR (95% CI)             | <i>P</i> value              |
|-----------------------------------------------------------------------|------------------------|--------|----------------|------------------|----|-------|-------|-------------------------|-----------------------------|
| <b><i>ERAP1</i><br/>rs17482078<br/>(<i>ERAP1</i><br/>p.Arg725Gln)</b> | Turkish<br>Discovery   | TOF-MS | BD             | 1180             | 60 | 1120  | 5.08  | 2.73 (2.45-7.23)        | 2.14x10 <sup>-5</sup>       |
|                                                                       |                        |        | Control        | 1245             | 24 | 1221  | 1.93  |                         |                             |
|                                                                       | Turkish<br>replication | TOF-MS | BD             | 837              | 37 | 800   | 4.42  | 4.12 (2.46-11.7)        | 2.35x10 <sup>-4</sup>       |
|                                                                       |                        |        | Control        | 630              | 7  | 623   | 1.11  |                         |                             |
|                                                                       | <b>Combined</b>        |        | <b>BD</b>      | <b>2017</b>      |    |       |       | <b>3.08 (2.04-4.65)</b> | <b>4.35x10<sup>-8</sup></b> |
|                                                                       |                        |        | <b>Control</b> | <b>1875</b>      |    |       |       |                         |                             |

\*Meta-analysis result is denoted in **bold**.

**Supplementary Table 5. SNP associations in *IL12A* and *ERAP1* loci in Japanese GWAS samples.**

| Marker     | Chromosome | Position  | Chi-Squared P | MAF   | Gene         | Odds Ratio |
|------------|------------|-----------|---------------|-------|--------------|------------|
| rs17753629 | 3          | 161130149 | 7.50E-01      | 0.113 | <i>IL12A</i> | 1.04       |
| rs6441282  | 3          | 161181771 | 1.69E-01      | 0.219 | <i>IL12A</i> | 1.15       |
| rs2133310  | 3          | 161199046 | 5.93E-01      | 0.147 | <i>IL12A</i> | 1.06       |
| rs545232   | 3          | 161214725 | 1.03E-01      | 0.197 | <i>IL12A</i> | 1.18       |
| rs2290674  | 5          | 96110187  | 5.39E-01      | 0.060 | <i>ERAP1</i> | 1.11       |
| rs17401719 | 5          | 96114802  | 5.63E-01      | 0.084 | <i>ERAP1</i> | 1.09       |
| rs27038    | 5          | 96138710  | 6.19E-01      | 0.229 | <i>ERAP1</i> | 1.05       |
| rs28050    | 5          | 96171180  | 2.22E-01      | 0.286 | <i>ERAP1</i> | 0.89       |
| rs34735    | 5          | 96191820  | 9.01E-01      | 0.368 | <i>ERAP1</i> | 1.01       |
| rs2042382  | 5          | 96214448  | 3.33E-01      | 0.139 | <i>ERAP1</i> | 1.12       |
| rs2927615  | 5          | 96223958  | 7.91E-01      | 0.020 | <i>ERAP1</i> | 1.08       |
| rs1230358  | 5          | 96237497  | 2.14E-01      | 0.311 | <i>ERAP1</i> | 0.89       |
| rs3733904  | 5          | 96241929  | 2.46E-01      | 0.132 | <i>ERAP1</i> | 0.87       |
| rs2549779  | 5          | 96242143  | 8.02E-01      | 0.440 | <i>ERAP1</i> | 0.98       |
| rs2549780  | 5          | 96242540  | 5.01E-01      | 0.491 | <i>ERAP1</i> | 0.95       |
| rs11135484 | 5          | 96247645  | 1.91E-02      | 0.489 | <i>ERAP1</i> | 0.82       |
| rs7733301  | 5          | 96289346  | 9.92E-02      | 0.124 | <i>ERAP1</i> | 0.81       |



**Supplementary Table 6. Quality scores for the Turkish GWAS imputation.**

| <b>Chromosome</b> | <b>Median Quality</b> | <b>Median Rsq</b> | <b>% Quality&gt;0.9</b> | <b>% Rsq&gt;0.3</b> | <b>Median dose R2</b> |
|-------------------|-----------------------|-------------------|-------------------------|---------------------|-----------------------|
| <b>1</b>          | 0.976                 | 0.916             | 80.5                    | 95.3                | 0.99988               |
| <b>2</b>          | 0.973                 | 0.911             | 79.9                    | 95.9                | 0.99973               |
| <b>3</b>          | 0.975                 | 0.916             | 80.4                    | 96.1                | 0.99978               |
| <b>4</b>          | 0.974                 | 0.911             | 78.6                    | 95.3                | 0.99987               |
| <b>5</b>          | 0.973                 | 0.906             | 78.6                    | 95.5                | 0.99982               |
| <b>6</b>          | 0.988                 | 0.957             | 85.5                    | 96.9                | 0.99988               |
| <b>7</b>          | 0.972                 | 0.907             | 78.3                    | 95.3                | 0.99980               |
| <b>8</b>          | 0.977                 | 0.925             | 82.7                    | 96.9                | 0.99970               |
| <b>9</b>          | 0.978                 | 0.924             | 81.6                    | 95.8                | 0.99962               |
| <b>10</b>         | 0.971                 | 0.901             | 78.6                    | 95.5                | 0.99982               |
| <b>11</b>         | 0.973                 | 0.907             | 78.4                    | 95.5                | 0.99982               |
| <b>12</b>         | 0.974                 | 0.912             | 78.6                    | 95.0                | 0.99986               |
| <b>13</b>         | 0.972                 | 0.905             | 78.5                    | 95.4                | 0.99989               |
| <b>14</b>         | 0.971                 | 0.899             | 77.9                    | 95.0                | 0.99986               |
| <b>15</b>         | 0.967                 | 0.880             | 74.5                    | 93.0                | 0.99969               |
| <b>16</b>         | 0.960                 | 0.860             | 72.5                    | 93.0                | 0.99963               |
| <b>17</b>         | 0.969                 | 0.894             | 75.1                    | 93.1                | 0.99985               |
| <b>18</b>         | 0.976                 | 0.919             | 79.3                    | 95.3                | 0.99984               |
| <b>19</b>         | 0.970                 | 0.886             | 73.6                    | 91.1                | 0.99989               |
| <b>20</b>         | 0.967                 | 0.884             | 74.5                    | 93.3                | 0.99982               |
| <b>21</b>         | 0.980                 | 0.937             | 82.9                    | 95.7                | 0.99978               |
| <b>22</b>         | 0.972                 | 0.905             | 78.5                    | 95.4                | 0.99982               |

Quality indicates the average posterior probability for the most likely genotype.

Rsq indicates the squared correlation between imputed and true genotypes.
